# Supplementary material for: Gastrointestinal Permeation Enhancers for the Development of Oral Peptide Pharmaceuticals
Source: MDPI journal article supplement (doi:10.3390/ph15121585), 2022-12-19
Supplement: s1 [file s1]

## Supplementary Materials

# Gastrointestinal Permeation Enhancers for the Development of Oral Peptide Pharmaceuticals

Jae Cheon Kim <sup>1</sup>, Eun Ji Park <sup>2,\*</sup> and Dong Hee Na <sup>1,\*</sup>

<sup>1</sup> College of Pharmacy, Chung-Ang University, Seoul 06974, Republic of Korea

<sup>2</sup> D&D Pharmatech, Seongnam, Gyeonggi-do 13486, Republic of Korea

\* Correspondence: ejpark@ddpharmatech.com (E.J.P.); dhna@cau.ac.kr (D.H.N)

**Table S1.** Clinical studies of oral drug formulations using sodium caprate (C10).

**Table S2.** Clinical studies of oral drug formulations using SNAC.

**Table S1.** Clinical studies of oral drug formulations using sodium caprate (C10).

| Drug        | Sponsor/<br>Collaborator | Description                                                                                                                                      | Outcome                                                                                                                                                                                                                              | Clinical Trials<br>(NCT code/Study completion year/Publication) |
|-------------|--------------------------|--------------------------------------------------------------------------------------------------------------------------------------------------|--------------------------------------------------------------------------------------------------------------------------------------------------------------------------------------------------------------------------------------|-----------------------------------------------------------------|
| Insulin 338 | Novo Nordisk A/S         | Insulin 338 with C10 (GIPET™ 1) in subjects with Type 2 DM (n = 40)<br>(To investigate the safety, tolerability, PK and PD)                      | disclosed                                                                                                                                                                                                                            | Phase 1<br>(NCT01796366/2013)                                   |
| Insulin 338 | Novo Nordisk A/S         | Insulin 338 with C10 (GIPET™ 1) in healthy subjects (n = 40)<br>(To investigate the PK/PD in a tablet formulation with three different coatings) | disclosed                                                                                                                                                                                                                            | Phase 1<br>(NCT01931137/2013)                                   |
| Insulin 338 | Novo Nordisk A/S         | Insulin 338 with C10 (GIPET™ 1) in healthy subjects (n = 45)<br>(To investigate the effect of food on the PK)                                    | Oral insulin 338 PK are not affected by food intake from 30 min after dosing.                                                                                                                                                        | Phase 1<br>(NCT02304627/2015)<br>[1]                            |
| Insulin 338 | Novo Nordisk A/S         | Insulin 338 with C10 (GIPET™ 1) in subjects with Type 2 DM (n = 50) over 8 weeks.<br>(To compare insulin-338 and insulin glargine)               | Insulin 338 can safely improve glycemic control with no evidence of a difference compared with insulin glargine.<br><br>However, it is not considered commercially viable due to its low BA (1.5-2.0 % compared to insulin glargine) | Phase 2<br>(NCT02470039 / 2015)<br>[2]                          |

|                  |                                                      |                                                                                                                                                                            |                                                                                                                                           |                                        |
|------------------|------------------------------------------------------|----------------------------------------------------------------------------------------------------------------------------------------------------------------------------|-------------------------------------------------------------------------------------------------------------------------------------------|----------------------------------------|
|                  |                                                      |                                                                                                                                                                            |                                                                                                                                           |                                        |
| Insulin 287      | Novo Nordisk A/S                                     | Insulin 287 with C10 (GIPET™ 1) in healthy subjects (n = 84)<br>(To investigate the safety, tolerability, PK and PD)                                                       | disclosed                                                                                                                                 | Phase 1<br>(NCT01809184 / 2013)        |
| Acyline          | University of Washington<br>/Merrion Pharmaceuticals | GIPET™ enhanced oral acyline (MER-104) in normal men (n = 9)<br>(To investigate the safety, efficacy, PK and PD)                                                           | Significant reduction in serum LH, FSH, and Testosterone were observed after 6 hours at all concentrations (10, 20, and 40 mg of acyline) | Phase 1<br>(NCT00471185 / 2007)<br>[3] |
| Acyline          | University of Washington<br>/Merrion Pharmaceuticals | GIPET™ enhanced oral acyline (MER-104-02) in normal men (n = 4)<br>(To determine steady-state (multiple-dose) PK)                                                          | Has a result                                                                                                                              | Phase 1/2<br>(NCT00603187 / 2011)      |
| Insulin Tregopil | Biocon                                               | Insulin Tregopil with C10 as PE in healthy subjects (n = 48)<br>(To evaluate the effect of insulin tregopil and C10 on PK of metformin under fed and fasting conditions. ) | C10/insulin tregopil did not affect the PK of metformin in either the fasting/fed state.                                                  | Phase 1<br>(2014)<br>[4]               |

**Table S2.** Clinical studies of oral drug formulations using SNAC.

| Drug                   | Sponsor/<br>Collaborator                                           | Description                                                                                                                      | Outcome                                                                                                                                                                                 | Clinical Trials<br>(NCT code/Study completion year/Publication) |
|------------------------|--------------------------------------------------------------------|----------------------------------------------------------------------------------------------------------------------------------|-----------------------------------------------------------------------------------------------------------------------------------------------------------------------------------------|-----------------------------------------------------------------|
| SNAC                   |                                                                    |                                                                                                                                  |                                                                                                                                                                                         |                                                                 |
| Vitamin B12            | Emisphere technologies                                             | Vitamin B12 with SNAC in healthy subjects (n = 20)<br>(To assess the PK of vitamin B12)                                          | 5 mg of vitamin B12 with 100 mg of SNAC was selected, indicating a BA of 5.09%.<br>(2.16% for commercial products)                                                                      | Phase Not applicable<br>(NCT01311739/2008)<br>[5]               |
| Unfractionated heparin | Emisphere technologies                                             | Unfractionated heparin with SNAC in healthy subjects (n = 16)<br>(To determine the PK/PD profile of oral unfractionated heparin) | Oral heparin alone did not show absorption, and heparin/SNAC combined administration showed that the BA based on anti-factor Xa and anti-factor II was 0.0219 and 0.0133%, respectively | [6]                                                             |
| Insulin                | Emisphere technologies                                             | Insulin with SNAC in non-diabetic subjects (n = 16)<br>(To examine the absorption of insulin from the GI tract, using SNAC)      | In all cases, a hypoglycemic effect was observed, and an increase in plasma insulin level was observed                                                                                  | [7]                                                             |
| GLP-1 and PYY3-36      | University Hospital, Basel, Switzerland/<br>Emisphere technologies | GLP-1, PYY3-36 with SNAC in healthy male subjects (n = 16)<br>(To explore potential interactions between two satiety signals)    | Experiments on the enhancement of oral peptide absorption by SNAC are not designed                                                                                                      | Phase 1 / 2<br>(NCT00822705 / 2009)<br>[8]                      |

|             |                  |                                                                                                                                                                                                                                                     |                                                                                                                                                                                            |                                         |
|-------------|------------------|-----------------------------------------------------------------------------------------------------------------------------------------------------------------------------------------------------------------------------------------------------|--------------------------------------------------------------------------------------------------------------------------------------------------------------------------------------------|-----------------------------------------|
| Semaglutide | Novo Nordisk A/S | Semaglutide/SNAC formulation with three different dosing conditions in healthy subjects (n = 78)<br>(To investigate the effect of food on the PK of oral semaglutide)                                                                               | Limited or no measurable semaglutide exposure was observed in the fed state.<br>Measurable semaglutide exposure was observed in the fasting state, and the AUC was also about 40% greater. | Phase 1<br>(NCT02172313 / 2014)<br>[9]  |
| Semaglutide | Novo Nordisk A/S | Semaglutide with SNAC in subject with renal impairment and with normal renal function (n = 71)<br>(To investigate the PK, safety and tolerability of oral semaglutide in subjects with various degree of impaired renal function)                   | There was no apparent effect of renal impairment or haemodialysis on the PK of oral semaglutide.                                                                                           | Phase 1<br>(NCT02014259 / 2014)<br>[10] |
| Semaglutide | Novo Nordisk A/S | Semaglutide with SNAC in subject with hepatic impairment and with normal hepatic function (n = 56)<br>(To investigate the PK, safety and tolerability of oral semaglutide in subjects with mild, moderate and severe degrees of hepatic impairment) | The PK parameters were similar across hepatic function groups.<br>No safety concern were identified in subjects with hepatic impairment receiving oral semaglutide.                        | Phase 1<br>(NCT02016911 / 2015)<br>[11] |
| Semaglutide | Novo Nordisk A/S | Semaglutide with SNAC in subject with T2DM with or without upper GI disease (n = 55)<br>(To investigate the effect of upper GI disease on the PK of oral semaglutide)                                                                               | The modelled PK profile were similar for subject with or without upper GI disease                                                                                                          | Phase 1<br>(NCT02877355 / 2017)<br>[12] |
| Semaglutide | Novo Nordisk A/S | Semaglutide with SNAC in subject with T2DM (n = 632)<br>(To examine the dose range, escalation and efficacy of oral semaglutide)                                                                                                                    | Oral semaglutide from 2.5 mg to 40 mg decreased HbA <sub>1c</sub> from 0.7% to 1.9% in a dose-dependent manner. The most common adverse                                                    | Phase 2<br>(NCT01923181 / 2014)<br>[13] |

|             |                  |                                                                                                                                                                 |                                                                                                                                                                                                                                                                                      |                                         |
|-------------|------------------|-----------------------------------------------------------------------------------------------------------------------------------------------------------------|--------------------------------------------------------------------------------------------------------------------------------------------------------------------------------------------------------------------------------------------------------------------------------------|-----------------------------------------|
|             |                  |                                                                                                                                                                 | event was mild to moderate gastrointestinal events.                                                                                                                                                                                                                                  |                                         |
| Semaglutide | Novo Nordisk A/S | Semaglutide with SNAC in subject with T2DM treated with diet and exercise only (n = 703)<br>(To investigate efficacy and safety of oral semaglutide)            | Oral semaglutide at 3 mg, 7 mg, and 14 mg combined with SNAC resulted in HbA <sub>1c</sub> reduction of 0.7%, 1.2%, and 1.4%, respectively, and the 14 mg dose resulted in a significant weight loss of 2.3 kg                                                                       | Phase 3<br>(NCT02906930 / 2017)<br>[14] |
| Semaglutide | Novo Nordisk A/S | Semaglutide with SNAC in subject with T2DM uncontrolled on metformin (n = 822)<br>(To investigate efficacy and safety of oral semaglutide versus empagliflozin) | Oral semaglutide showed a better HbA <sub>1c</sub> reduction compared to empagliflozin in the group administered for 26 weeks (-1.3% vs -0.9%), and the group administered for 52 weeks showed a better weight loss.                                                                 | Phase 3<br>(NCT02863328 / 2019)<br>[15] |
| Semaglutide | Novo Nordisk A/S | Semaglutide with SNAC in subject with T2DM and moderate renal impairment (n = 324)<br>(To investigate efficacy and safety of oral semaglutide versus placebo)   | When administered for 26 weeks, the estimated treatment differences were 0.8% and 2.5 kg, respectively, compared to placebo in HbA <sub>1c</sub> reduction and weight loss.<br><br>More adverse events occurred than in the placebo group, and most were mild-to-moderate GI events. | Phase 3<br>(NCT02827708 / 2017)<br>[16] |

|             |                  |                                                                                                                                                                                                                              |                                                                                                                                                                                                                                                  |                                         |
|-------------|------------------|------------------------------------------------------------------------------------------------------------------------------------------------------------------------------------------------------------------------------|--------------------------------------------------------------------------------------------------------------------------------------------------------------------------------------------------------------------------------------------------|-----------------------------------------|
| Semaglutide | Novo Nordisk A/S | Semaglutide/SNAC alone or Semaglutide/SNAC with omeprazole in healthy subjects (n = 54)<br>(To investigate the influence of omeprazole on the PK of oral semaglutide)                                                        | There was a slight non-statistically significant increase in semaglutide exposure when oral semaglutide was administered with omeprazole, but this is not considered clinically relevant and no dose adjustment is likely to be required.        | Phase 1<br>(NCT02249871 / 2015)<br>[17] |
| Semaglutide | Novo Nordisk A/S | Lisinopril or warfarin with subsequent coadministration with SNAC alone followed by oral semaglutide in healthy subjects (n = 52)<br>(To investigate the influence of oral semaglutide on the PK of lisinopril and warfarin) | There was no apparent effect of oral semaglutide on AUC and C <sub>max</sub> for lisinopril and warfarin.                                                                                                                                        | Phase 1<br>(NCT02070510 / 2014)<br>[18] |
| Semaglutide | Novo Nordisk A/S | Digoxin or metformin with subsequent coadministration with SNAC alone followed by oral semaglutide in healthy subjects (n = 32)<br>(To investigate the influence of oral semaglutide on PK of metformin and digoxin)         | There was no apparent effect of oral semaglutide on AUC and C <sub>max</sub> for digoxin.<br>The AUC of metformin was increased by 32% by oral semaglutide coadministration versus metformin alone, whereas the C <sub>max</sub> was unaffected. | Phase 1<br>(NCT02249910 / 2015)<br>[18] |
| Semaglutide | Novo Nordisk A/S | Ethinylestradiol/Levonogestrel alone or together with oral semaglutide or SNAC in healthy postmenopausal females (n = 25)<br>(To investigate the influence of oral semaglutide on PK of ethinylestradiol and levonogestrel)  | The AUC and C <sub>max</sub> of ethinylestradiol and levonogestrel were not affected by oral semaglutide and SNAC administration                                                                                                                 | Phase 1<br>(NCT02845219 / 2016)<br>[19] |

|             |                  |                                                                                                                                                                                                                                                                                  |                                                                                                                                                                                                                                                                                                              |                                                  |
|-------------|------------------|----------------------------------------------------------------------------------------------------------------------------------------------------------------------------------------------------------------------------------------------------------------------------------|--------------------------------------------------------------------------------------------------------------------------------------------------------------------------------------------------------------------------------------------------------------------------------------------------------------|--------------------------------------------------|
| SNAC        | Novo Nordisk A/S | <p>SNAC in healthy male subjects<br/>(n = 84)</p> <p>(To evaluate the effect of SNAC on cardiac repolarization)</p>                                                                                                                                                              | <p>There was no unacceptable prolongation of the QTc interval with SNAC 3.6 g, the maximum investigated SNAC</p>                                                                                                                                                                                             | <p>Phase 1<br/>(NCT02911870 / 2017)<br/>[20]</p> |
| Semaglutide | Novo Nordisk A/S | <p>Levothyroxine alone, or with concomitant SNAC or concomitant oral semaglutide in healthy subjects<br/>(n = 45)</p> <p>(To investigate the influence of oral semaglutide on the PK of levothyroxine and the influence of co-administered tablets on the PK of semaglutide)</p> | <p>A 33% increase in total T4 exposure was observed with levothyroxine/oral semaglutide vs levothyroxine alone.</p> <p>A 34% decrease in semaglutide AUC was observed when oral semaglutide was co-administered with placebo tablet.</p>                                                                     | <p>Phase 1<br/>(NCT02920385 / 2017)<br/>[21]</p> |
| Semaglutide | Novo Nordisk A/S | <p>Single doses of furosemide and rosuvastatin alone, with SNAC alone or with oral semaglutide in healthy subjects (n = 41)</p> <p>(To investigate the effect of oral semaglutide on the PK of furosemide and rosuvastatin)</p>                                                  | <p>The no-effect-criterion was not met for furosemide and rosuvastatin for the AUC (estimated ratios [90% CI] 1.28[1.16-1.42] and 1.41[1.24-1.60], respectively).</p> <p>SNAC alone did not affect the AUC or C<sub>max</sub> of rosuvastatin; the C<sub>max</sub> of furosemide was slightly decreased.</p> | <p>Phase 1<br/>(NCT03010475 / 2017)<br/>[19]</p> |
| Semaglutide | Novo Nordisk A/S | <p>Semaglutide /SNAC alone, ciclosporin with semaglutide /SNAC, and probenecid with semaglutide/SNAC in healthy subjects (n = 21)</p> <p>(To investigate the effect of the medicines, probenecid and ciclosporin on the concentration of SNAC)</p>                               | <p>Disclosed</p>                                                                                                                                                                                                                                                                                             | <p>Phase 1<br/>(NCT03466567 / 2018)</p>          |

|                                  |                  |                                                                                                                                                                                                                                                                                              |           |                                        |
|----------------------------------|------------------|----------------------------------------------------------------------------------------------------------------------------------------------------------------------------------------------------------------------------------------------------------------------------------------------|-----------|----------------------------------------|
| Semaglutide                      | Novo Nordisk A/S | Semaglutide with SNAC in healthy, lactating females (n = 14)<br>(To investigate how much semaglutide and SNAC is in the milk)                                                                                                                                                                | -         | Phase 1<br>(NCtT04817644 / Recruiting) |
| Semaglutide                      | Novo Nordisk A/S | Semaglutide with SNAC in children and teenagers with T2DM (n = 132)<br>(To test if semaglutide is safe in children and teenagers)                                                                                                                                                            | -         | Phase 3<br>(NCtT04596631 / Recruiting) |
| Semaglutide                      | Novo Nordisk A/S | Current semaglutide/SNAC formulation (includes 3 helping agents) or new semaglutide/SNAC formulation (includes only one helping agent) in healthy subjects (n = 278)<br>(To find out if the dosage strength of the current formulation of semaglutide can be reduced in the new formulation) | Disclosed | Phase 1<br>(NCT04109508 / 2021)        |
| Semaglutide                      | Novo Nordisk A/S | Current semaglutide/SNAC formulation or 4 new semaglutide/SNAC formulations with different helping agents in different amounts in healthy subjects (n = 290)<br>(To test oral semaglutide of 25 mg and 50 mg)                                                                                | Disclosed | Phase 1<br>(NCT04524832 / 2022)        |
| NNC0113-2023<br>(GLP-1R agonist) | Novo Nordisk A/S | NNC0113-2023 with SNAC in healthy male subjects (n = 40)<br>(To assess safety and participant tolerability, To measure the concentration                                                                                                                                                     | Disclosed | Phase 1<br>(NCT03617081 / 2018)        |

|                                   |                  |                                                                                                                                                                                                                      |           |                                       |
|-----------------------------------|------------------|----------------------------------------------------------------------------------------------------------------------------------------------------------------------------------------------------------------------|-----------|---------------------------------------|
|                                   |                  | and of NNC0113-2023 and its break-down products)                                                                                                                                                                     |           |                                       |
| NNC0385-0434<br>(PCSK9 inhibitor) | Novo Nordisk A/S | NNC0385-0434 with SNAC in healthy subjects (n = 73)<br>(To investigate the effect of food intake on the amount of NNC0385-0434 in the blood)                                                                         | Disclosed | Phase 1<br>(NCT05091073 / 2022)       |
| NNC0385-0434<br>(PCSK9 inhibitor) | Novo Nordisk A/S | NNC0385-0434 with SNAC in healthy japanese male (n = 36)<br>(To look at how NNC0385-0434 works in the body and how it is removed from the body)                                                                      | Disclosed | Phase 1<br>(NCT05003440 / 2022)       |
| NNC0385-0434<br>(PCSK9 inhibitor) | Novo Nordisk A/S | NNC0385-0434 with SNAC in subjects with established ASCVD or ASCVD risk on maximally tolerated statin dose and other lipid-lowering therapy requiring further LDL-C reduction (n = 255)<br>(To investigate efficacy) | Disclosed | Phase 2<br>(NCT04992065 / 2022)       |
| NNC0385-0434<br>(PCSK9 inhibitor) | Novo Nordisk A/S | NNC0385-0434 with SNAC in healthy subjects and subjects with impaired kidney function (n = 60)<br>(To investigate of PK, safety and tolerability of oral NNC0385-0434 in subjects with various degree of impaired    | -         | Phase 1<br>(NCT05094934 / Recruiting) |

---

renal function and in subjects with  
normal renal function)

---

## References

1. Halberg, I.B.; Lyby, K.; Wassermann, K.; Heise, T.; Plum-Mörschel, L.; Zijlstra, E. The Effect of Food Intake on the Pharmacokinetics of Oral Basal Insulin: A Randomised Crossover Trial in Healthy Male Subjects. *Clin Pharmacokinet* **2019**, *58*, 1497-1504, doi:10.1007/s40262-019-00772-2.
2. Halberg, I.B.; Lyby, K.; Wassermann, K.; Heise, T.; Zijlstra, E.; Plum-Mörschel, L. Efficacy and safety of oral basal insulin versus subcutaneous insulin glargine in type 2 diabetes: a randomised, double-blind, phase 2 trial. *Lancet Diabetes Endocrinol* **2019**, *7*, 179-188, doi:10.1016/s2213-8587(18)30372-3.
3. Amory, J.K.; Leonard, T.W.; Page, S.T.; O'Toole, E.; McKenna, M.J.; Bremner, W.J. Oral administration of the GnRH antagonist acylone, in a GIPET-enhanced tablet form, acutely suppresses serum testosterone in normal men: single-dose pharmacokinetics and pharmacodynamics. *Cancer Chemother Pharmacol* **2009**, *64*, 641-645, doi:10.1007/s00280-009-1038-1.
4. Khedkar, A.; Lebovitz, H.; Fleming, A.; Cherrington, A.; Jose, V.; Athalye, S.N.; Vishweswaramurthy, A. Impact of Insulin Tregopil and Its Permeation Enhancer on Pharmacokinetics of Metformin in Healthy Volunteers: Randomized, Open-Label, Placebo-Controlled, Crossover Study. *Clin Transl Sci* **2019**, *12*, 276-282, doi:10.1111/cts.12609.
5. Castelli, M.C.; Wong, D.F.; Friedman, K.; Riley, M.G. Pharmacokinetics of oral cyanocobalamin formulated with sodium N-[8-(2-hydroxybenzoyl)amino]caprylate (SNAC): an open-label, randomized, single-dose, parallel-group study in healthy male subjects. *Clin Ther* **2011**, *33*, 934-945, doi:10.1016/j.clinthera.2011.05.088.
6. Mousa, S.A.; Zhang, F.; Aljada, A.; Chaturvedi, S.; Takieddin, M.; Zhang, H.; Chi, L.; Castelli, M.C.; Friedman, K.; Goldberg, M.M.; et al. Pharmacokinetics and pharmacodynamics of oral heparin solid dosage form in healthy human subjects. *J Clin Pharmacol* **2007**, *47*, 1508-1520, doi:10.1177/0091270007307242.
7. Kidron, M.; Dinh, S.; Menachem, Y.; Abbas, R.; Variano, B.; Goldberg, M.; Arbit, E.; Bar-On, H. A novel per-oral insulin formulation: proof of concept study in non-diabetic subjects. *Diabet Med* **2004**, *21*, 354-357, doi:10.1111/j.1464-5491.2004.01160.x.
8. Steinert, R.E.; Poller, B.; Castelli, M.C.; Drewe, J.; Beglinger, C. Oral administration of glucagon-like peptide 1 or peptide YY 3-36 affects food intake in healthy male subjects. *Am J Clin Nutr* **2010**, *92*, 810-817, doi:10.3945/ajcn.2010.29663.
9. Bækdal, T.A.; Breitschaft, A.; Donsmark, M.; Maarbjerg, S.J.; Søndergaard, F.L.; Borregaard, J. Effect of Various Dosing Conditions on the Pharmacokinetics of Oral Semaglutide, a Human Glucagon-Like Peptide-1 Analogue in a Tablet Formulation. *Diabetes Ther* **2021**, *12*, 1915-1927, doi:10.1007/s13300-021-01078-y.
10. Granhall, C.; Søndergaard, F.L.; Thomsen, M.; Anderson, T.W. Pharmacokinetics, Safety and Tolerability of Oral Semaglutide in Subjects with Renal Impairment. *Clin Pharmacokinet* **2018**, *57*, 1571-1580, doi:10.1007/s40262-018-0649-2.
11. Bækdal, T.A.; Thomsen, M.; Kupčová, V.; Hansen, C.W.; Anderson, T.W. Pharmacokinetics, Safety, and Tolerability of Oral Semaglutide in Subjects With Hepatic Impairment. *J Clin Pharmacol* **2018**, *58*, 1314-1323, doi:10.1002/jcph.1131.
12. Overgaard, R.V.; Navarria, A.; Ingwersen, S.H.; Bækdal, T.A.; Kildemoes, R.J. Clinical Pharmacokinetics of Oral Semaglutide: Analyses of Data from Clinical Pharmacology Trials. *Clin Pharmacokinet* **2021**, *60*, 1335-1348, doi:10.1007/s40262-021-01025-x.
13. Davies, M.; Pieber, T.R.; Hartoft-Nielsen, M.L.; Hansen, O.K.H.; Jabbour, S.; Rosenstock, J. Effect of Oral Semaglutide Compared With Placebo and Subcutaneous Semaglutide on Glycemic Control in Patients With Type 2 Diabetes: A Randomized Clinical Trial. *Jama* **2017**, *318*, 1460-1470, doi:10.1001/jama.2017.14752.
14. Aroda, V.R.; Rosenstock, J.; Terauchi, Y.; Altuntas, Y.; Lalic, N.M.; Morales Villegas, E.C.; Jeppesen, O.K.; Christiansen, E.; Hertz, C.L.; Haluzík, M. PIONEER 1: Randomized Clinical Trial of the Efficacy and Safety of Oral Semaglutide Monotherapy in Comparison With Placebo in Patients With Type 2 Diabetes. *Diabetes Care* **2019**, *42*, 1724-1732, doi:10.2337/dc19-0749.

15. Rodbard, H.W.; Rosenstock, J.; Canani, L.H.; Deerochanawong, C.; Gumprecht, J.; Lindberg, S.; Lingvay, I.; Søndergaard, A.L.; Treppendahl, M.B.; Montanya, E. Oral Semaglutide Versus Empagliflozin in Patients With Type 2 Diabetes Uncontrolled on Metformin: The PIONEER 2 Trial. *Diabetes Care* **2019**, *42*, 2272-2281, doi:10.2337/dc19-0883.
16. Mosenzon, O.; Blicher, T.M.; Rosenlund, S.; Eriksson, J.W.; Heller, S.; Hels, O.H.; Pratley, R.; Sathyapalan, T.; Desouza, C. Efficacy and safety of oral semaglutide in patients with type 2 diabetes and moderate renal impairment (PIONEER 5): a placebo-controlled, randomised, phase 3a trial. *Lancet Diabetes Endocrinol* **2019**, *7*, 515-527, doi:10.1016/s2213-8587(19)30192-5.
17. Bækdal, T.A.; Breitschaft, A.; Navarria, A.; Hansen, C.W. A randomized study investigating the effect of omeprazole on the pharmacokinetics of oral semaglutide. *Expert Opin Drug Metab Toxicol* **2018**, *14*, 869-877, doi:10.1080/17425255.2018.1488965.
18. Bækdal, T.A.; Borregaard, J.; Hansen, C.W.; Thomsen, M.; Anderson, T.W. Effect of Oral Semaglutide on the Pharmacokinetics of Lisinopril, Warfarin, Digoxin, and Metformin in Healthy Subjects. *Clin Pharmacokinet* **2019**, *58*, 1193-1203, doi:10.1007/s40262-019-00756-2.
19. Jordy, A.B.; Albayaty, M.; Breitschaft, A.; Anderson, T.W.; Christiansen, E.; Houshmand-Øregaard, A.; Manigandan, E.; Bækdal, T.A. Effect of Oral Semaglutide on the Pharmacokinetics of Levonorgestrel and Ethinylestradiol in Healthy Postmenopausal Women and Furosemide and Rosuvastatin in Healthy Subjects. *Clin Pharmacokinet* **2021**, *60*, 1171-1185, doi:10.1007/s40262-020-00976-x.
20. Granhall, C.; Bækdal, T.A.; Breitschaft, A.; Søndergaard, F.L.; Anderson, T.W.; Thomsen, M. Absence of QTc Prolongation with Sodium N-(8-[2-Hydroxybenzoyl] Amino) Caprylate (SNAC), an Absorption Enhancer Co-Formulated with the GLP-1 Analogue Semaglutide for Oral Administration. *Diabetes Ther* **2021**, *12*, 2599-2610, doi:10.1007/s13300-021-01106-x.
21. Hauge, C.; Breitschaft, A.; Hartoft-Nielsen, M.L.; Jensen, S.; Bækdal, T.A. Effect of oral semaglutide on the pharmacokinetics of thyroxine after dosing of levothyroxine and the influence of co-administered tablets on the pharmacokinetics of oral semaglutide in healthy subjects: an open-label, one-sequence crossover, single-center, multiple-dose, two-part trial. *Expert Opin Drug Metab Toxicol* **2021**, *17*, 1139-1148, doi:10.1080/17425255.2021.1955856.
